# Supplementary material for: Comparative Genomic Analysis of Human and Chimpanzee Indicates a Key Role for Indels in Primate Evolution
Source: Springer Nature journal article supplement (doi:10.1007/s00239-006-0045-7), 2006-10-29
Supplement: supp.pdf [file supp.pdf]

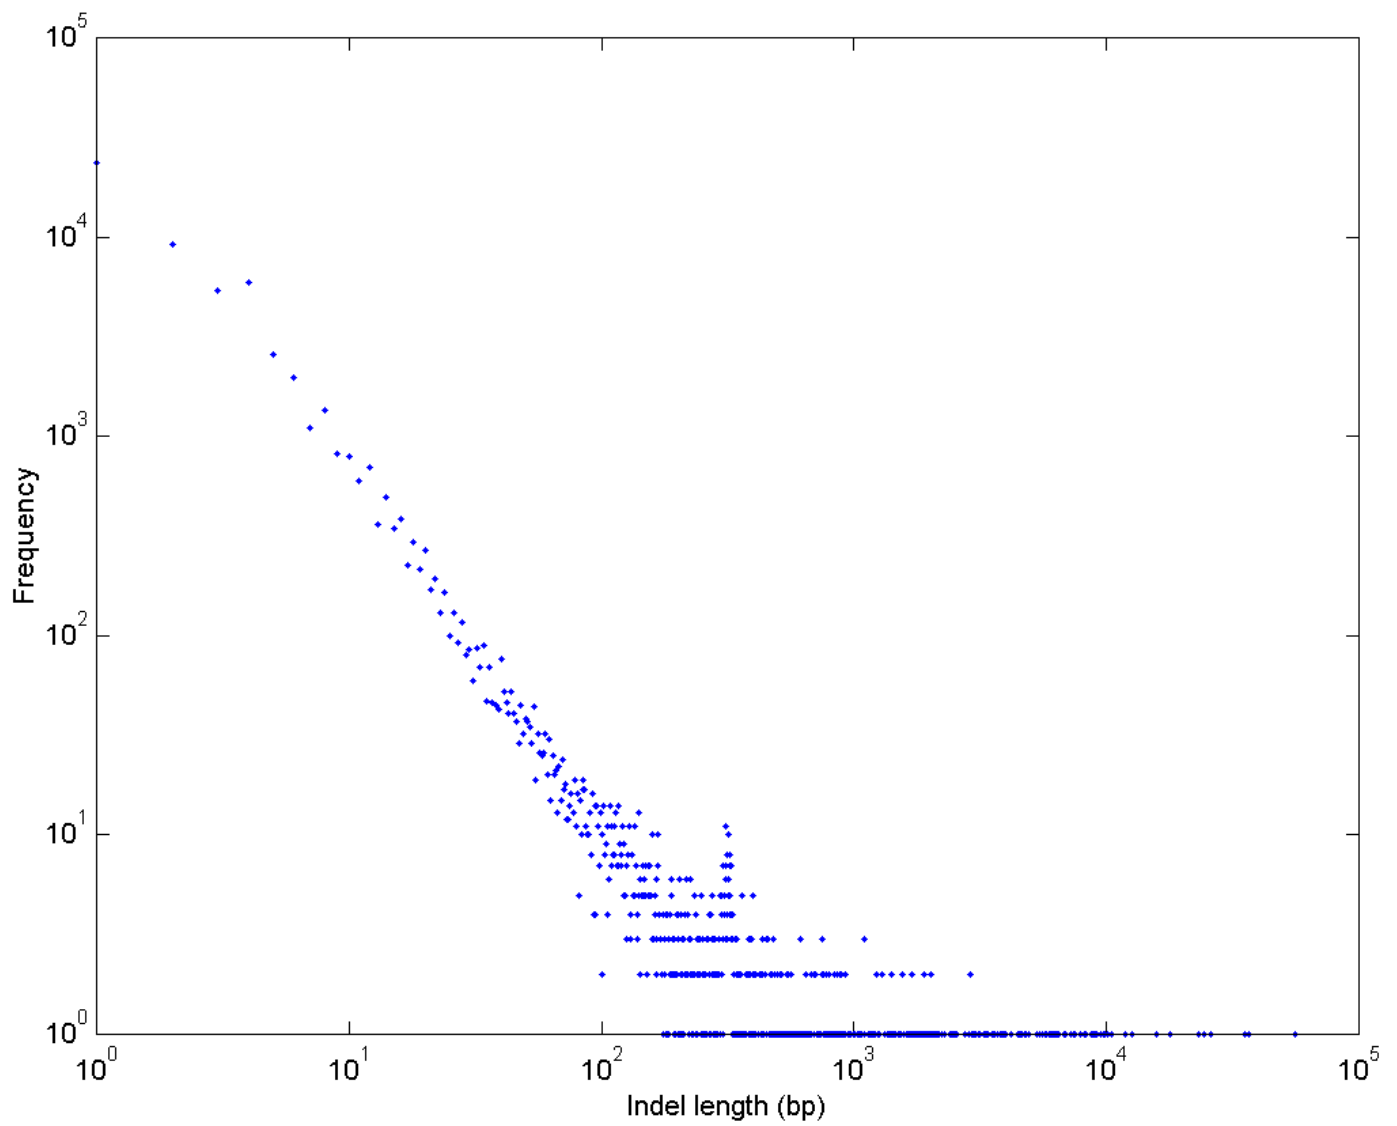

Supplementary Figure 1. The frequency distribution of indel lengths. The x-axis represents the indel length and the frequency of each length (raw counts) is shown in y-axis, both axes are logarithmic.

## Supplementary material

*Table S1. Genes with 3n- indels that do not disrupt the reading frame in the chimpanzee transcript*

| Gene                     | Transcript      | Annotated indels <sup>a</sup>                                                                                                                                                                      | Verification in chimpanzee <sup>d</sup> | Macaque <sup>e</sup>                                         |
|--------------------------|-----------------|----------------------------------------------------------------------------------------------------------------------------------------------------------------------------------------------------|-----------------------------------------|--------------------------------------------------------------|
| CU002_HUMAN              | ENST00000339818 | Ins H: aa184 (Ser)<br>Del H: aa 325 (Leu)                                                                                                                                                          | Indel aa 325 confirmed                  | Both indels identical to C                                   |
| CU045_HUMAN              | ENST00000290130 | Ins H/ Del C: aa 72 (Glu)                                                                                                                                                                          | No sequence available                   | No available sequence                                        |
| CU070_HUMAN <sup>b</sup> | ENST00000291634 | Ins H/ Del C: aa 88-89 (Ser,Val)                                                                                                                                                                   | Indel confirmed                         | No available sequence                                        |
| CLIC6 <sup>b</sup>       | ENST00000349499 | Del C: aa 178-187 (Asp, Ser, Val, Glu, Ala, Glu, Gly, Arg, Val, Gly), aa 205-214 (Pro, Leu, Gly, Asp, Asn, Ile, Gln, Ala, Glu, Gly), aa 245-254 (Arg, Val, Gly, Asp, Ser, Val, Glu, Ala, Gly, Asp) | All three indels confirmed              | All three indels identical to H                              |
| CLIC6 <sup>b</sup>       | ENST00000338833 | Del C: aa 178-187 (Asp, Ser, Val, Glu, Ala, Glu, Gly, Arg, Val, Gly), aa 205-214 (Pro, Leu, Gly, Asp, Asn, Ile, Gln, Ala, Glu, Gly), aa 245-254 (Arg, Val, Gly, Asp, Ser, Val, Glu, Ala, Gly, Asp) | All three indels confirmed              | All three indels identical to H                              |
| IFNAR2                   | ENST00000342101 | Ins H: aa 352 (Glu)                                                                                                                                                                                | Indel confirmed                         | Indel identical to C                                         |
| KRTAP10-4 <sup>b</sup>   | ENST00000344145 | Ins C: aa 168-172 (Pro, Val, Cys, Cys, Val), aa 196 (Gly), aa 203-205 (Leu, Ser, Cys), aa 250-254 (Ser, Ile, Cys, Cys, Lys)<br>Del H: aa 273-277 (Ser, Ser, Cys,                                   | Indels aa 168-172 and aa 196 confirmed. | Indel aa 273-277 identical to C, other indels identical to H |

|                           |                 |                                                                                                                                     |                                      |                                                                          |
|---------------------------|-----------------|-------------------------------------------------------------------------------------------------------------------------------------|--------------------------------------|--------------------------------------------------------------------------|
| KRTAP13-4 <sup>b</sup>    | ENST00000334068 | Gln, Ser)<br>Del H: aa 24-28<br>(Ser, Ser, Cys,<br>Gly, Phe), aa 68-<br>77 (Ser, Tyr, Val,<br>Glu, Ser, Ser, Pro,<br>Cys, Gln, Tyr) | Both indels<br>confirmed             | Both indels<br>identical to C                                            |
| KRTAP15-6 <sup>b</sup>    | ENST00000334067 | Del C: aa 72 (Gln)                                                                                                                  | Indel confirmed                      | Indel identical<br>to H                                                  |
| KRTAP19-7 <sup>b</sup>    | ENST00000334849 | Del C: aa 21<br>(Leu)<br>Ins C: aa 32<br>(Gly), aa 38-39<br>(Cys, Gly)                                                              | Alignment<br>unclear                 | All three indels<br>identical to H                                       |
| KRTAP6-3 <sup>b,c</sup>   | ENST00000327378 | Del H: aa 29-30<br>(Ser, Leu)<br>Ins H/ Del C: aa<br>36 (Gly)<br>Ins C: aa 47-48<br>(Tyr, Val)                                      | Alignment<br>unclear                 | Indel aa 29-30<br>identical to C,<br>aa 47-48<br>identical to H          |
| MCM3AP                    | ENST00000291688 | Del C: aa 939<br>(Cys)<br>Ins C: aa 1000<br>(Val)                                                                                   | Indel aa 1000<br>confirmed.          | Both indels<br>identical to H                                            |
| Q9NSH7_HUMAN <sup>b</sup> | ENST00000332666 | Del H: aa 112-113<br>(Arg, Pro)                                                                                                     | No sequence<br>available             | Indel identical<br>to C                                                  |
| Q9NSI5_HUMAN <sup>b</sup> | ENST00000328060 | Del C: aa 92 (Gln)<br>Ins H: aa 250<br>(Arg)                                                                                        | Both indels<br>confirmed             | Indel aa 92<br>identical to H,<br>aa 250<br>identical to C               |
| SLC19A1                   | ENST00000344609 | Del C: aa 116<br>(Pro)                                                                                                              | No sequence<br>available             | Indel identical<br>to H                                                  |
| SLC19A1                   | ENST00000311124 | Del C: aa 235<br>(Pro)                                                                                                              | No sequence<br>available             | Indel identical<br>to H                                                  |
| SON <sup>b</sup>          | ENST00000321758 | Del H: bp 7141                                                                                                                      | Indel confirmed                      | Indel identical<br>to C                                                  |
| SYNJ1 <sup>b</sup>        | ENST00000322229 | Del C/ Ins H: aa<br>1296-1297 (Gln,<br>Val)<br>Ins H: aa 1357-<br>1358 (Asn, Val)                                                   | Indel aa 1357-<br>1358<br>confirmed. | Indel aa 1296-<br>1297 poor<br>alignment, aa<br>1357-1358<br>identical C |
| TRPM2                     | ENST00000300481 | Del C: aa15 (Glu)                                                                                                                   | Indel confirmed                      | Indel identical<br>to H                                                  |
| TRPM2                     | ENST00000300482 | Del C: aa15 (Glu)                                                                                                                   | Indel confirmed                      | Indel identical<br>to H                                                  |

<sup>a</sup> Annotation of indels refer to the analysis of chimpanzee BAC clone sequences from RIKEN.

<sup>b</sup> Indel not previously reported by Watanabe et al.

<sup>c</sup> Not translated according to Ensembl.

<sup>d</sup> Verified in the chimpanzee WGS assembly.

<sup>e</sup> Sequence for macaque was obtained from the comparative track in the Ensembl browser (version 36).

*Table S2. Primers used for re-sequencing of indels and substitutions causing premature stop codons.*

| <b>Gene</b> | <b>Transcript(s)</b> | <b>Forward</b>              | <b>Reverse</b>       |
|-------------|----------------------|-----------------------------|----------------------|
| ABCG1       | ENST00000340588      | ATCCTGCACGTGGTCAGTC         | CTCATCCTCACCTTCCTCCA |
| CU121_HUMAN | ENST00000332872      | CGTTTCCTTAATGGCTGGAA        | AGAGTCCAGGATGACGATGG |
| CU124_HUMAN | ENST00000327574      | GTCACGTGGGCAGCTTCT          | AGCTCACGGTGTGGAAAAAT |
| CU129_HUMAN | ENST00000331508      | AAGTCCCATGTGCTGTCTC         | CAGACTGTCCACTGCGAAGA |
| CU032_HUMAN | ENST00000327663      | TGACTGGCATGAAGTATACAAACTATA | AACCTGGGCATACGGTCAT  |
| CU090_HUMAN | ENST00000330490      | TGCCAGCAATTGCATTTTAA        | ATGCCATCCTCTCCAGCTAA |
| PIGP        | ENST00000329667      | CCTGGGGCTTTAGACAATC         | GTCTGTGCGCCCCAGAACC  |
| FAM3B       | ENST00000337056      | GAGCGTGCTCAAATCCAGTT        | GCTTTCCAGGGCAAGTTGTA |
| Q6ZR03      | ENST00000343732      | CGGTTATCAACGTCCTCCTG        | CTGGGAGGGAAGTCAGATCC |
| Q9NS10      | ENST00000328881      | CCATGACCAGGATTATGAACA       | CGTTGTTGAGGTTGTCATCG |
